# Supplementary material for: A NIGT1-centred transcriptional cascade regulates nitrate signalling and incorporates phosphorus starvation signals in Arabidopsis
Source: PubMed Central journal article supplement (PMC5893545; doi:10.1038/s41467-018-03832-6), 2018-04-10
Supplement: 41467_2018_3832_MOESM1_ESM.pdf [file 41467_2018_3832_MOESM1_ESM.pdf]

Supplementary Information

**A NIGT1-centered transcriptional cascade regulates nitrate signalling  
and incorporates phosphorus starvation signals in Arabidopsis**

Maeda et al.

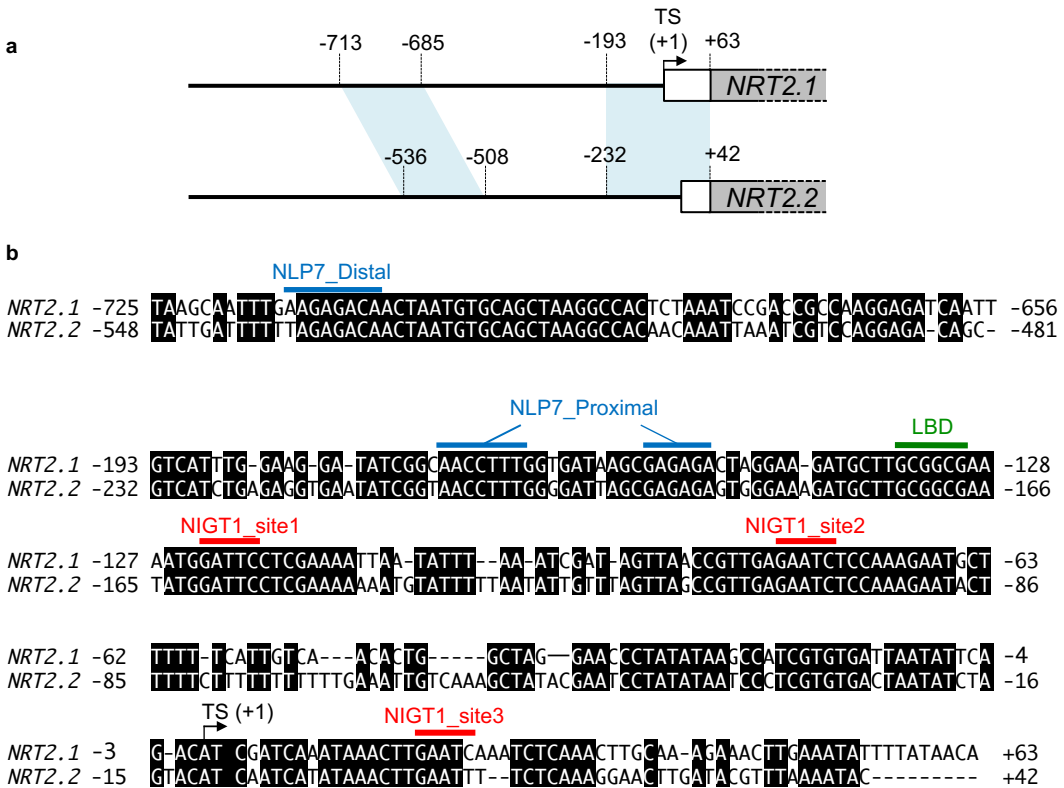

**Supplementary Figure 1 | Alignment of the *NRT2.1* and *NRT2.2* promoters.** Positions (a) and sequences (b) of two regions that are homologous between the *NRT2.1* and *NRT2.2* promoter sequences. In b, blue, red and green bars above the *NRT2.1* promoter sequence indicate sequences similar to the consensus sequences for NLP-, NIGT1-, and LBD-binding, respectively. The distal NLP-binding site (NLP7\_Distal) is only similar to a part of the NLP-binding sequence in the *NIR1* promoter<sup>1</sup>. These sequences are conserved in the *NRT2.1* and *NRT2.2* promoters. Numbers indicate nucleotide positions relative to the transcription start site (TS) of *NRT2.1*. The 5'-untranslated regions of *NRT2.1* cDNAs registered in the database (accession numbers: Z97058, AF093754 and AF019748) are 63, 49 bp and 44 bp in length. The position of the 63th nucleotide upstream of the translational start codon is adopted as a putative TS, and numbers are relative to the putative TS.

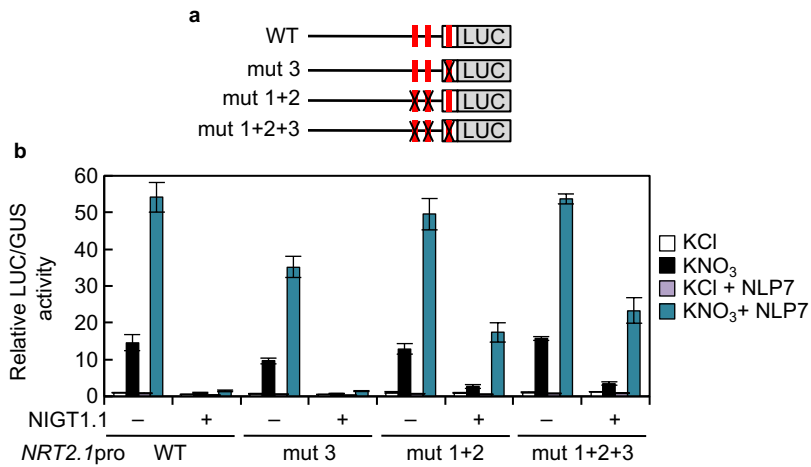

**Supplementary Figure 2 | Effects of mutations within the putative NIGT1-binding site.** (a) Reporter constructs. X indicates disrupted NIGT1 sites. (b) LUC activity from protoplasts that were co-transfected with the *LUC* gene fused to the wild-type or mutant *NRT2.1* promoter and the NLP7 expression vector or an empty vector and incubated in the presence of 1 mM KCl or KNO<sub>3</sub>. LUC activity was normalised with GUS activity from the reference UBQ10-GUS plasmid and data are means ± s.d. of three biological replicates.

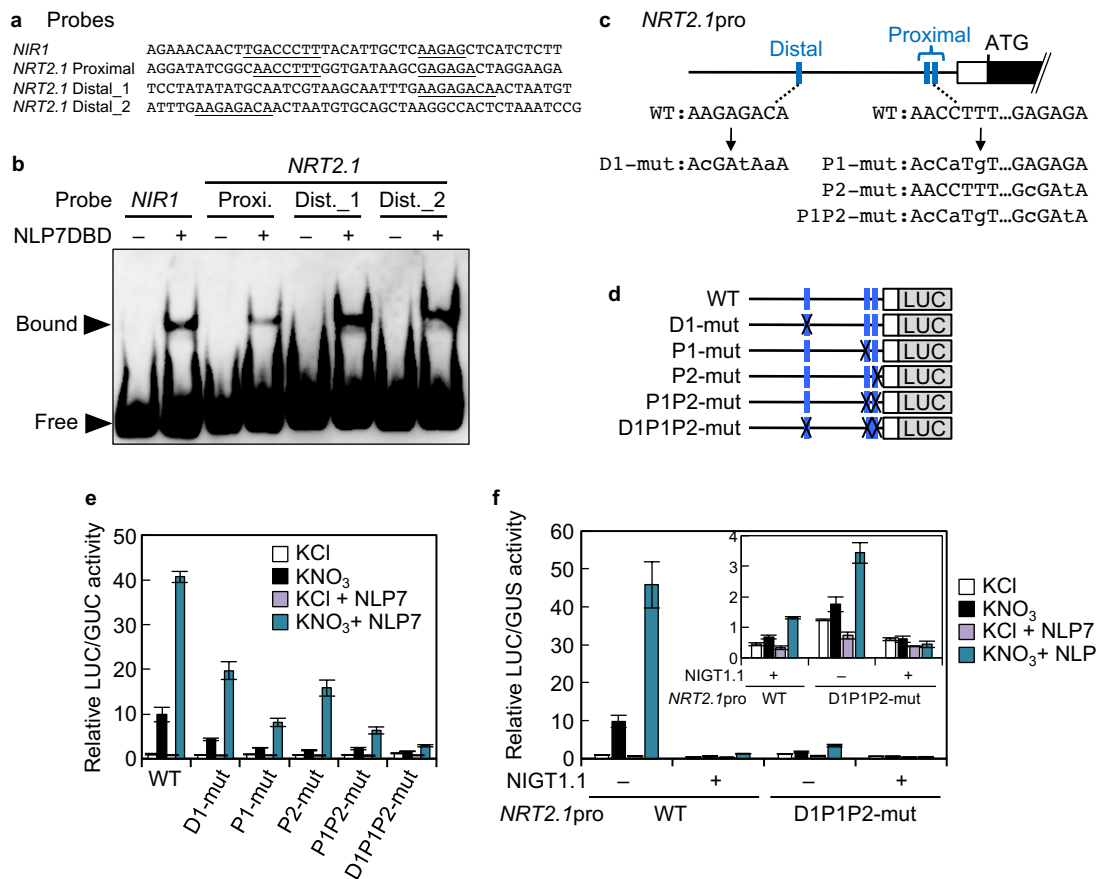

**Supplementary Figure 3 | Identification of NLP-binding sites in the *NRT2.1* promoter.** (a) DNA probes used in EMSA. (b) EMSA with the DNA fragments from the *NRT2.1* promoter and the DNA-binding domain of NLP7 (NLP7DBD). Distal\_1 and Distal\_2 probes feature the same distal NLP-binding sequence (see Supplementary Figure 1b). The NLP-binding sequence from the *NIR1* promoter<sup>1</sup> was used as a positive control. (c) A schematic representation of the 1.3 kb *NRT2.1* promoter. A horizontal line and a white box indicate the 5' upstream and the 5' untranslated regions, respectively. Blue boxes indicate two putative NLP-binding sites. Mutations in the mutated *NRT2.1* promoters are shown below the wild-type (WT) sequences. (d) Reporter constructs harbouring mutations on the NLP-binding sites. Mutated sites are indicated with X. (e,f) Protoplast transient assays for investigation of nitrate- and NLP7-dependent activation (e) and NIGT1.1-dependent repression (f) of mutated *NRT2.1* promoters. Protoplasts co-transfected with a reporter construct and the NLP7 or NIGT1.1 expression vector or an empty vector were incubated in the presence of 1 mM KCl or KNO<sub>3</sub>. In e,f, LUC activity was normalised with GUS activity from the reference UBQ10-GUS plasmid and data are means ± s.d. of three biological replicates.

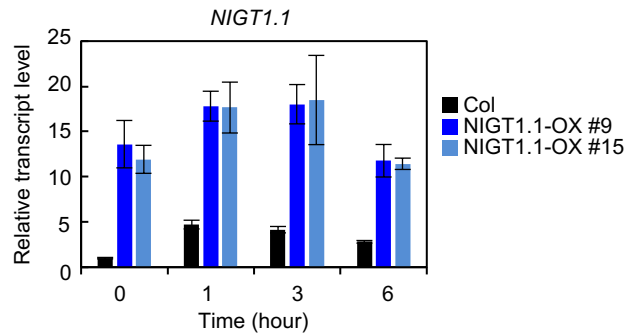

**Supplementary Figure 4 | Levels of *NIGT1.1* transcripts in transgenic *Arabidopsis* lines harbouring the *NIGT1.1* gene under the control of the *UBQ10* promoter.** Seedlings of *Arabidopsis* Col and two independent transgenic lines were grown with ammonium medium for 5 days, treated with  $\text{KNO}_3$  (final concentration, 10 mM) to induce endogenous *NIGT1.1* expression, and then collected at the indicated time points. Levels of the *NIGT1.1* transcripts were quantified by RT-qPCR. The values for the NIGT1.1-OX lines indicate total levels of transcripts from endogenous and introduced *NIGT1.1* genes, whereas the values for Col seedlings indicate solely the levels of transcripts from endogenous *NIGT1.1*. Values were normalised with those of *UBQ10*, and means  $\pm$  s.d. of biological triplicates are shown.

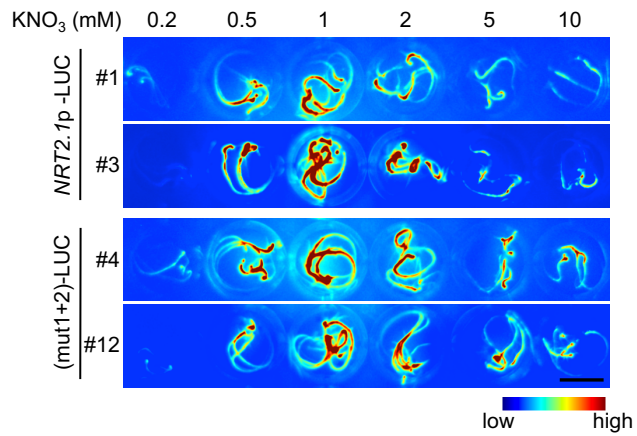

**Supplementary Figure 5** | Effects of the disruption of the NIGT1-binding sites on *NRT2.1* promoter activity in the presence of different concentrations of  $\text{KNO}_3$ . Three seedlings of transgenic lines harbouring the *LUC* gene fused to the wild-type (WT) or the mutated (mut1+2) *NRT2.1* promoter were grown with indicated concentrations of  $\text{KNO}_3$  for 6 days. Images of LUC activity *in vivo* were captured in two independent transgenic lines. Scale bar, 1 cm.

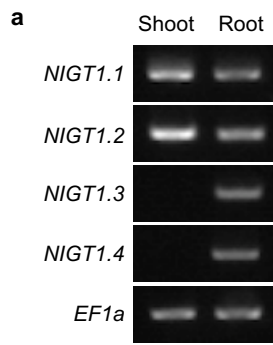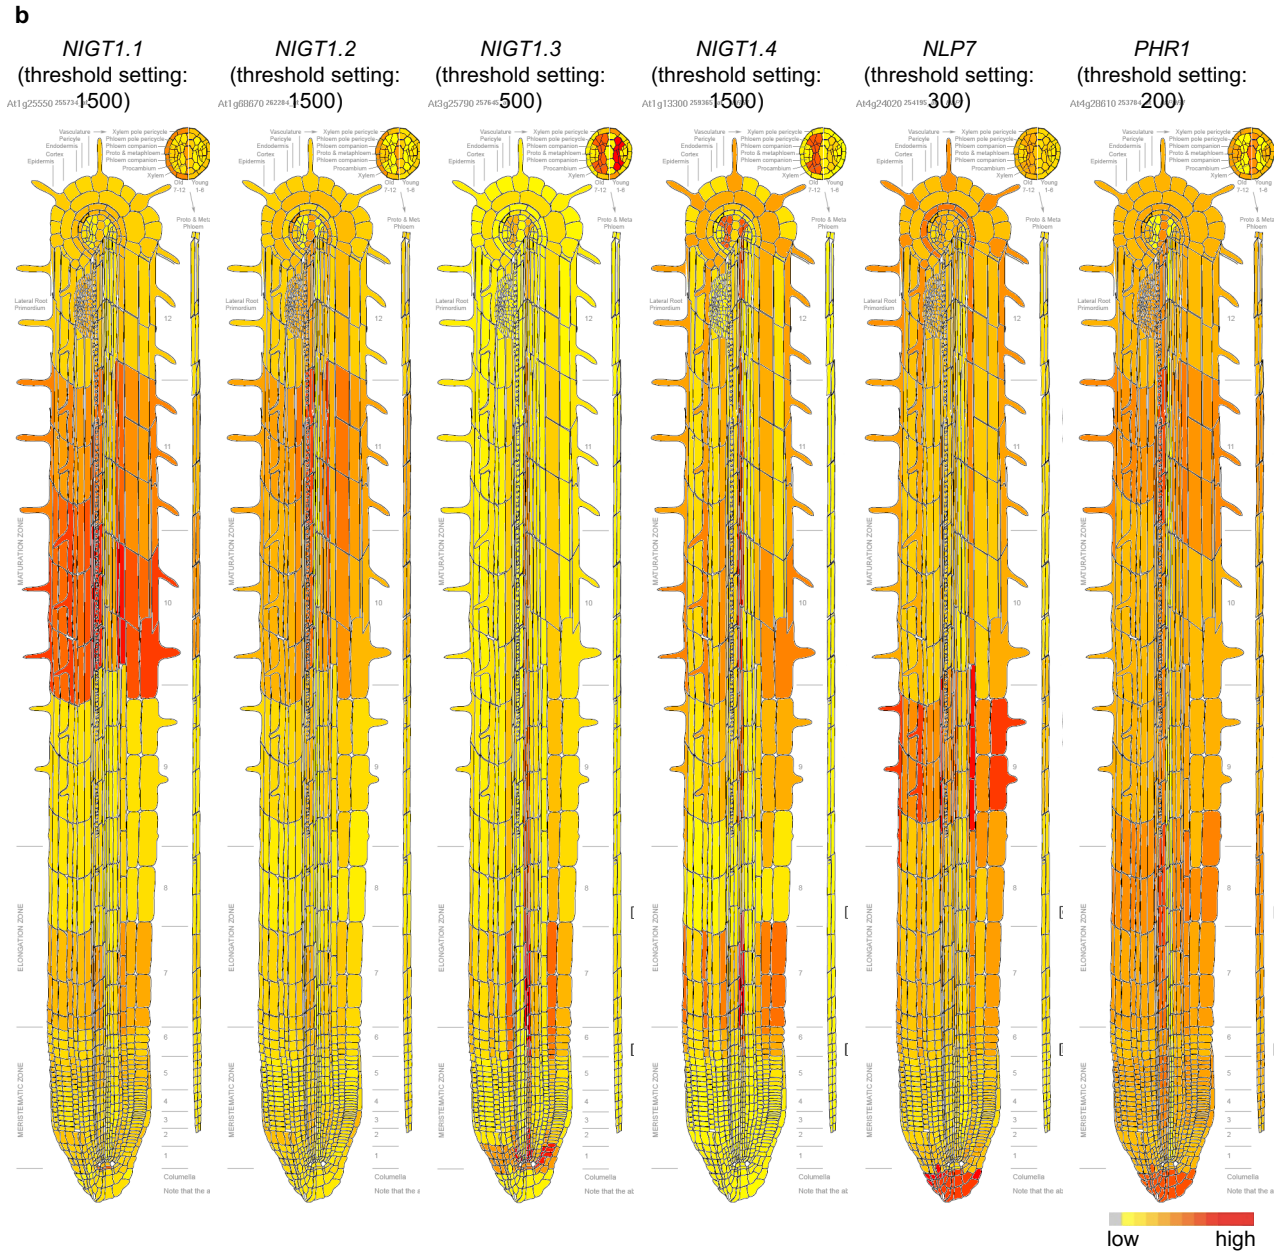

**Supplementary Figure 6 | Expression of NIGT1-clade genes.** (a) Expression in shoots and roots. RT-PCR analysis was performed with cDNA prepared from RNA isolated from shoots or roots of 14-day-old seedlings grown on 1/2MS plates supplemented with 1% sucrose. *EF1a* is a housekeeping gene and was used as a control. (b) Expression in roots. Images for expression of NIGT1-clade genes, *NLP7* and *PHR1* in roots, which are from Arabidopsis eFP Browser<sup>2</sup> (<http://bbc.botany.utoronto.ca/efp/cgi-bin/efpWeb.cgi>).

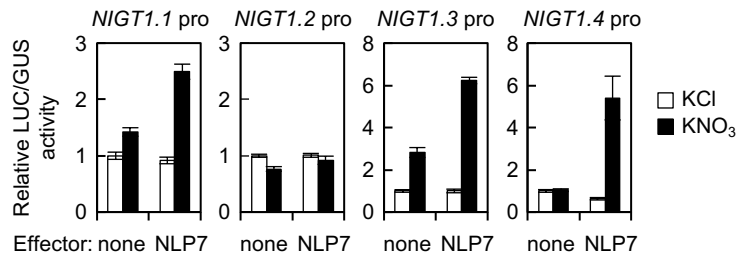

**Supplementary Figure 7 | Activation of *NIGT1* gene promoters by nitrate and NLP7.** Activation of promoters of *NIGT1* genes by nitrate and co-expression of NLP7 in protoplasts. The reporter plasmid containing the *LUC* gene downstream of the 1 kb promoter sequence of *NIGT1.1*, *1.2*, *1.3*, or *1.4* was co-transfected into protoplasts isolated from nitrogen-starved plants, together with the expression vector for NLP7 (NLP7) or the empty vector (none). UBQ10-GUS plasmid was included in all transfection reactions for the normalisation of transfection efficiency. Transfected protoplasts were incubated overnight with 10 mM KCl or KNO<sub>3</sub>. LUC activity was normalised with GUS activity, and data are means ± s.d. (n=3).



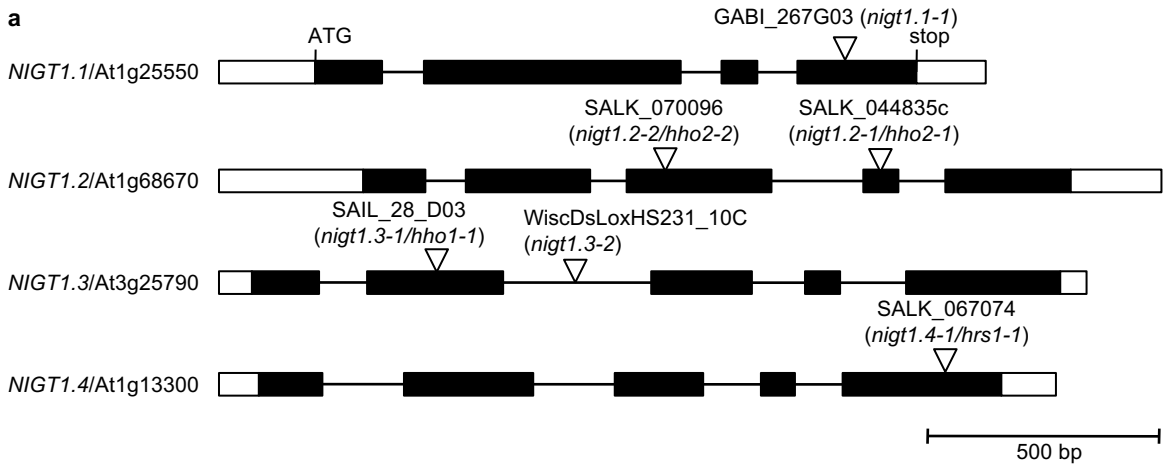

**b**

|                | <i>NIGT1.1</i> | <i>NIGT1.2</i> | <i>NIGT1.3</i>     | <i>NIGT1.4</i> |
|----------------|----------------|----------------|--------------------|----------------|
| <i>nigtQ-1</i> | GABI_267G03    | SALK_044835c   | SAIL_28_D03        | SALK_067074    |
| <i>nigtQ-2</i> | GABI_267G03    | SALK_070096    | SAIL_28_D03        | SALK_067074    |
| <i>nigtQ-3</i> | GABI_267G03    | SALK_044835c   | WiscDsLoxHS231_10C | SALK_067074    |
| <i>nigt123</i> | GABI_267G03    | SALK_044835c   | WiscDsLoxHS231_10C | -              |
| <i>nigt124</i> | GABI_267G03    | SALK_070096    | -                  | SALK_067074    |
| <i>nigt134</i> | GABI_267G03    | -              | WiscDsLoxHS231_10C | SALK_067074    |
| <i>nigt234</i> | -              | SALK_070096    | WiscDsLoxHS231_10C | SALK_067074    |

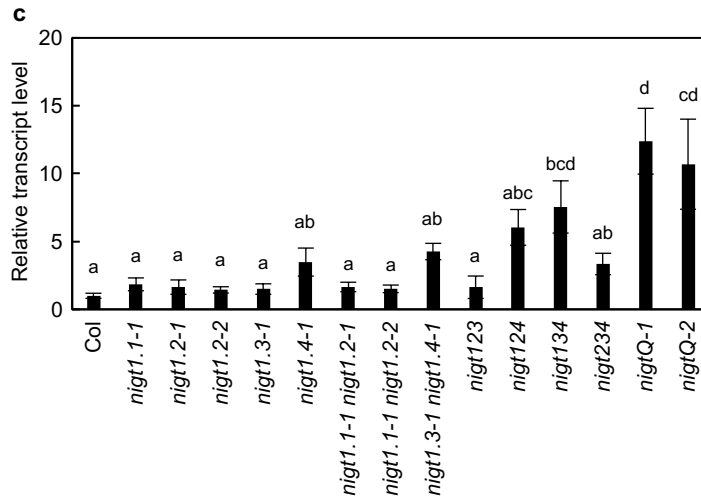

**Supplementary Figure 8 | *nigt1* T-DNA lines.** (a) Positions of T-DNA insertions in *NIGT1* genes. Boxes and horizontal lines indicate exons and introns, respectively. White and black boxes indicate untranslated and coding regions, respectively. (b) Combination of T-DNA insertion alleles in the *nigt1* quadruple mutants Q-1, Q-2 and Q-3, and triple mutants (*nigt123*, *124*, *134* and *234*). (c) *NRT2.1* transcript levels in single, double, triple and quadruple *nigt1* mutants. Plants were grown on 1/2MS plates supplemented with 1% sucrose for 9 days. Values are mean  $\pm$  s.d. ( $n=3$ ). Bars not sharing the same letter designation are significantly different from each other (Tukey's HSD,  $p < 0.05$ ).

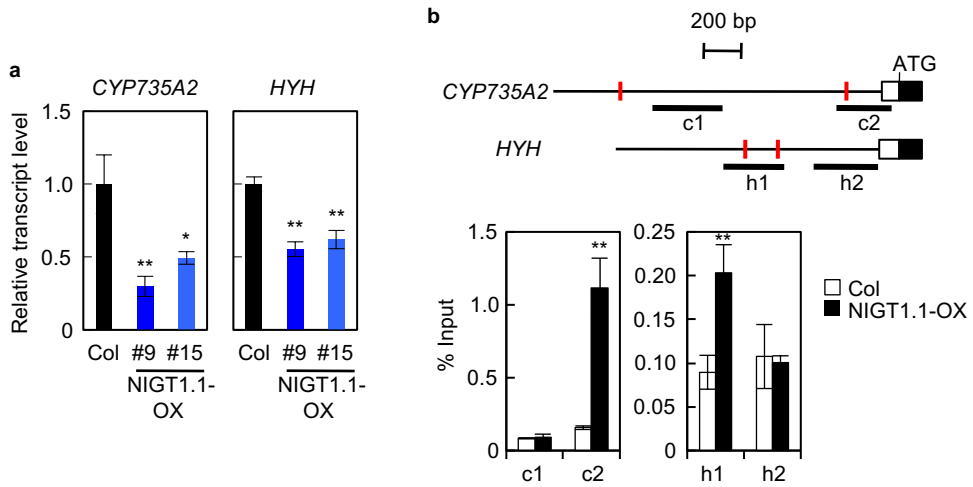

**Supplementary Figure 9 | Targets of NIGT1 proteins include CYP735A2 and HYH.** (a) Reduced expression of *CYP735A2* and *HYH* in the NIGT1.1 overexpressor. RNA from seedlings of Arabidopsis Col and NIGT1.1-OX lines (#9 and #15) was used for RT-qPCR. Data are means of three biological samples  $\pm$  s.d. \*  $p < 0.05$ , \*\*  $p < 0.01$  by two-tailed *t*-test compared with corresponding control values obtained with Col seedlings. (b) Binding of NIGT1.1 to the *CYP735A2* and *HYH* promoters *in vivo*. ChIP was performed with seedlings of Col and the NIGT1.1-OX line. Two different regions were amplified by qPCR with immunoprecipitated DNA. Data are means of four biological samples  $\pm$  s.d. \*\*  $p < 0.01$  by one-tailed *t*-test compared with corresponding control values obtained with Col seedlings.

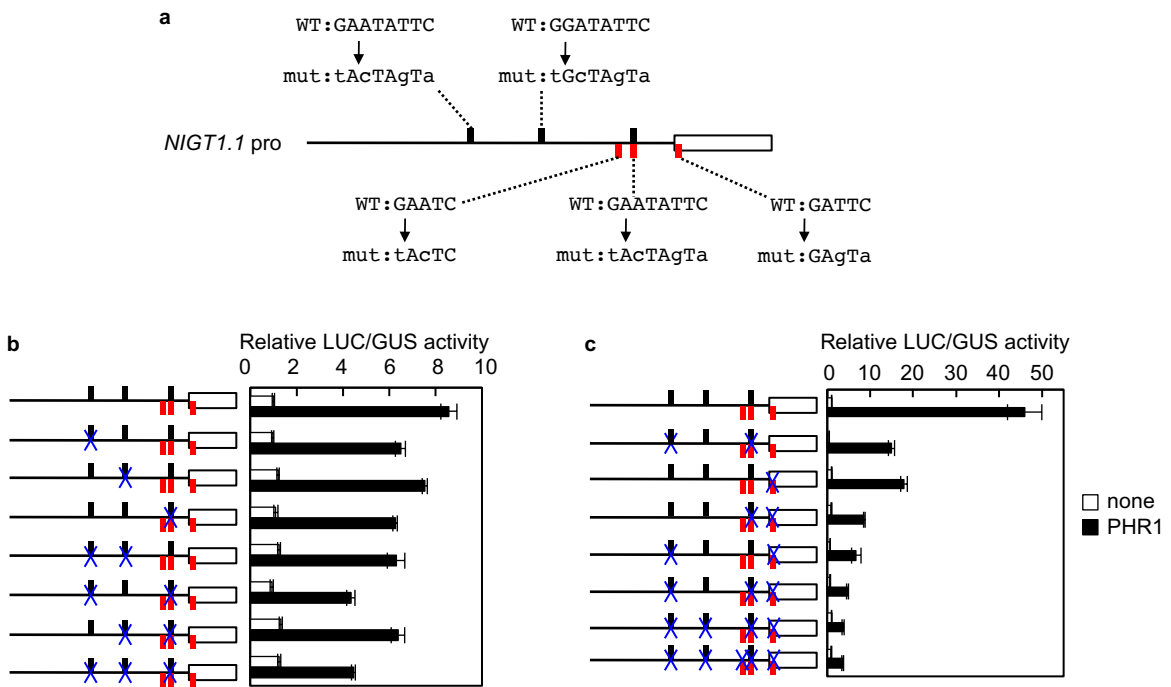

**Supplementary Figure 10 | Transactivation of mutant *NIGT1.1* promoters by PHR1.** (a) A schematic representation of the 1 kb *NIGT1.1* promoter. A horizontal line and a white box indicate the upstream sequence and the 5' untranslated region, respectively. Black and red boxes indicate the P1BS sequence (5'-GNATATNC-3') and the conserved NIGT1-binding sequences (5'-GAATC-3' and 5'-GAATATTC-3'), respectively. Mutated sequences (mut) are shown below the wild-type (WT) sequences. (b,c) Transactivation of mutated *NIGT1.1* promoters by PHR1 in protoplasts. Mutated sites are indicated with blue X. LUC activity was normalised with GUS activity, and data are means  $\pm$  s.d. of three biological replicates.

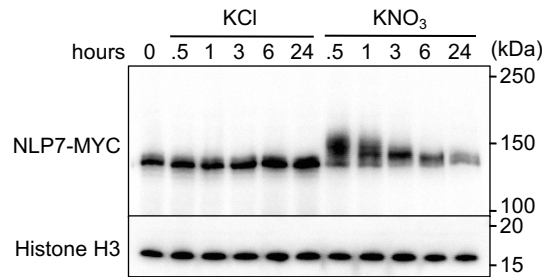

**Supplementary Figure 11 | Decreases in the NLP7 protein level after nitrate treatment.** Seedlings expressing MYC-tagged NLP7<sup>3</sup> were grown in nitrogen-free 1/10MS solution supplemented with 0.5 mM ammonium succinate [1/10 MS salts, 0.1 g l<sup>-1</sup> MES-KOH (pH5.7), 0.5% sucrose, 0.5 mM ammonium succinate] for 4 days and treated with 10 mM KCl or KNO<sub>3</sub>. Seedlings were collected at indicated time points after the onset of the treatment and used for immunoblot analysis with anti-MYC or anti-Histone H3 antibodies. NLP7 proteins in the active form (retarded bands) more rapidly disappeared, compared with ones in the inactive form.

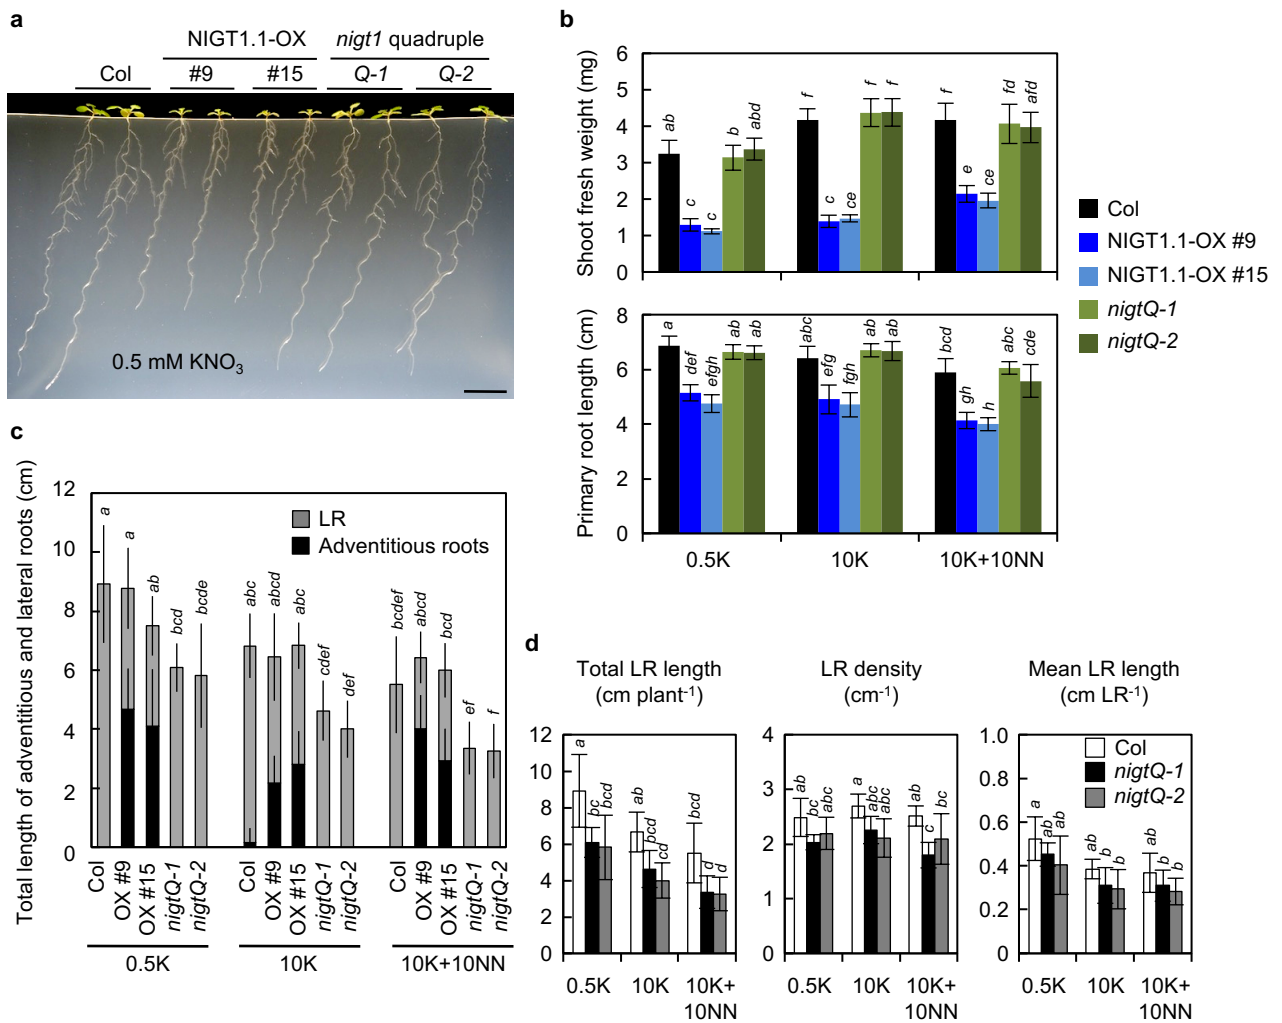

**Supplementary Figure 12 | Growth of NIGT1.1-overexpressing plants and *nigt1* quadruple mutants.** (a) Image of seedlings grown on a plate containing 0.5 mM KNO<sub>3</sub> as N source. Scale bar, 1 cm. Shoot fresh weight and primary root length (b), total length of adventitious roots and lateral roots (LR) (c), and total LR length, LR density, and mean length of LR (d) of Arabidopsis Col, NIGT1.1-OX, and *nigt1* mutants grown under three different N-nutrient conditions (0.5K, 0.5 mM KNO<sub>3</sub>; 10K, 10 mM KNO<sub>3</sub>; 10K+10NN, 10 mM KNO<sub>3</sub>+10 mM NH<sub>4</sub>NO<sub>3</sub>). Seedlings were initially grown on 1/2MS plates containing 9.4 mM KNO<sub>3</sub> and 10.3 mM NH<sub>4</sub>NO<sub>3</sub> as N sources for 3 days, and then grown on test plates containing the indicated N source for 6 days. NIGT1.1-OX plants developed unusually long adventitious roots. Values are means ± s.d. (*n*=8). Bars not sharing the same letter designation are significantly different from each other (Tukey's HSD, *p* < 0.05). In c, the statistical test was performed for the total length of adventitious and lateral roots.

Supplementary Table 1. Cytokinin contents

| pmol g <sup>-1</sup> FW | Parental line (4xNRE-min-GUS) |                  | NLP6-SUPRD #7  |                  | NLP6-SUPRD #14 |                  | Col             |                  | nlp6 nlp7-1     |                  | nigtQ-3         |                  | nigtQ-3+NIGT1.2 |                  | GFP-OX          |                  | NIGT1.2GFP-OX   |                  |
|-------------------------|-------------------------------|------------------|----------------|------------------|----------------|------------------|-----------------|------------------|-----------------|------------------|-----------------|------------------|-----------------|------------------|-----------------|------------------|-----------------|------------------|
|                         | KCl                           | KNO <sub>3</sub> | KCl            | KNO <sub>3</sub> | KCl            | KNO <sub>3</sub> | KCl             | KNO <sub>3</sub> | KCl             | KNO <sub>3</sub> | KCl             | KNO <sub>3</sub> | KCl             | KNO <sub>3</sub> | KCl             | KNO <sub>3</sub> | KCl             | KNO <sub>3</sub> |
| iZ                      | N.D.                          | 1.080 ± 0.174    | N.D.           | 0.185 ± 0.048    | 0.028 ± 0.055  | 0.207 ± 0.054    | 0.138 ± 0.048   | 0.917 ± 0.088    | 0.024 ± 0.049   | 0.209 ± 0.162    | 0.027 ± 0.053   | 0.883 ± 0.104    | 0.035 ± 0.048   | 1.034 ± 0.073    | 0.085 ± 0.058   | 0.931 ± 0.087    | N.D.            | 0.587 ± 0.099    |
| iZR                     | 0.384 ± 0.054                 | 13.024 ± 1.270   | 0.563 ± 0.060  | 2.337 ± 0.330    | 0.539 ± 0.082  | 2.950 ± 0.271    | 0.866 ± 0.131   | 13.244 ± 0.768   | 0.280 ± 0.019   | 4.656 ± 0.208    | 0.607 ± 0.117   | 13.797 ± 0.547   | 0.387 ± 0.055   | 12.322 ± 0.483   | 0.274 ± 0.171   | 9.350 ± 0.234    | 0.507 ± 0.036   | 8.371 ± 0.301    |
| iZRPs                   | 2.039 ± 0.295                 | 62.875 ± 5.681   | 2.447 ± 0.227  | 11.716 ± 0.732   | 2.366 ± 0.092  | 14.422 ± 1.041   | 2.972 ± 0.454   | 45.753 ± 3.624   | 1.473 ± 0.210   | 19.228 ± 1.267   | 3.167 ± 0.150   | 68.848 ± 3.023   | 1.620 ± 0.146   | 52.452 ± 2.730   | 2.055 ± 0.279   | 56.292 ± 3.314   | 3.057 ± 0.501   | 44.819 ± 4.076   |
| cZ                      | 0.394 ± 0.053                 | 0.305 ± 0.045    | 0.499 ± 0.107  | 0.247 ± 0.057    | 0.292 ± 0.041  | 0.216 ± 0.017    | 0.884 ± 0.040   | 0.324 ± 0.047    | 0.416 ± 0.045   | 0.152 ± 0.053    | 0.531 ± 0.068   | 0.282 ± 0.029    | 0.599 ± 0.079   | 0.142 ± 0.135    | 0.540 ± 0.078   | 0.250 ± 0.063    | 0.169 ± 0.195   | 0.123 ± 0.142    |
| cZR                     | 0.783 ± 0.136                 | 0.586 ± 0.069    | 0.852 ± 0.056  | 0.613 ± 0.070    | 0.884 ± 0.050  | 0.589 ± 0.047    | 1.026 ± 0.097   | 0.762 ± 0.043    | 0.655 ± 0.107   | 0.475 ± 0.035    | 0.961 ± 0.090   | 0.615 ± 0.069    | 0.787 ± 0.027   | 0.566 ± 0.048    | 0.617 ± 0.162   | 0.700 ± 0.107    | 1.036 ± 0.148   | 0.863 ± 0.214    |
| cZRPs                   | 4.662 ± 0.272                 | 2.423 ± 0.144    | 5.782 ± 0.569  | 2.907 ± 0.143    | 5.248 ± 0.186  | 2.501 ± 0.115    | 5.539 ± 0.247   | 2.555 ± 0.136    | 3.987 ± 0.202   | 1.841 ± 0.088    | 5.797 ± 0.538   | 2.497 ± 0.066    | 4.549 ± 0.277   | 2.045 ± 0.176    | 4.274 ± 0.190   | 2.483 ± 0.237    | 7.415 ± 0.516   | 3.558 ± 0.083    |
| DZ                      | N.D.                          | N.D.             | N.D.           | N.D.             | N.D.           | N.D.             | N.D.            | N.D.             | 0.072           | N.D.             | N.D.            | N.D.             | N.D.            | N.D.             | N.D.            | N.D.             | N.D.            | N.D.             |
| DZR                     | N.D.                          | 0.227 ± 0.031    | N.D.           | N.D.             | N.D.           | N.D.             | N.D.            | 0.344 ± 0.023    | N.D.            | N.D.             | N.D.            | 0.255 ± 0.039    | N.D.            | 0.210 ± 0.015    | N.D.            | 0.102 ± 0.027    | N.D.            | N.D.             |
| DZRPs                   | N.D.                          | 0.681 ± 0.112    | N.D.           | 0.116 ± 0.015    | N.D.           | 0.158 ± 0.033    | 0.089 ± 0.015   | 0.648 ± 0.051    | N.D.            | 0.135 ± 0.007    | N.D.            | 0.730 ± 0.053    | N.D.            | 0.602 ± 0.048    | N.D.            | 0.402 ± 0.020    | N.D.            | 0.325 ± 0.061    |
| iP                      | 0.463 ± 0.054                 | 0.641 ± 0.474    | 0.450 ± 0.528  | 0.683 ± 0.461    | 0.451 ± 0.307  | 0.728 ± 0.199    | 0.827 ± 0.097   | 0.622 ± 0.078    | 0.385 ± 0.449   | 0.175 ± 0.350    | 0.909 ± 1.054   | 1.642 ± 0.482    | 0.914 ± 0.072   | 1.226 ± 0.359    | 1.551 ± 0.144   | 1.404 ± 0.557    | 1.767 ± 0.337   | 0.990 ± 1.353    |
| iPR                     | 0.222 ± 0.071                 | 0.736 ± 0.036    | 0.224 ± 0.027  | 0.403 ± 0.078    | 0.224 ± 0.065  | 0.278 ± 0.058    | 0.455 ± 0.068   | 1.148 ± 0.141    | 0.183 ± 0.025   | 0.574 ± 0.022    | 0.256 ± 0.028   | 0.780 ± 0.063    | 0.277 ± 0.024   | 0.631 ± 0.106    | 0.125 ± 0.106   | 0.697 ± 0.124    | 0.482 ± 0.135   | 1.057 ± 0.113    |
| iPRPs                   | 8.260 ± 0.773                 | 29.220 ± 2.078   | 7.599 ± 0.428  | 13.323 ± 1.288   | 6.861 ± 0.197  | 10.440 ± 1.023   | 16.620 ± 1.121  | 36.881 ± 2.360   | 6.870 ± 0.809   | 32.559 ± 1.063   | 11.222 ± 0.749  | 45.613 ± 2.847   | 9.233 ± 0.640   | 32.888 ± 1.573   | 14.473 ± 0.816  | 35.240 ± 3.318   | 15.145 ± 1.691  | 36.537 ± 2.446   |
| iZ7G                    | 1.178 ± 0.169                 | 4.477 ± 0.249    | 1.444 ± 0.122  | 1.737 ± 0.115    | 1.395 ± 0.042  | 1.822 ± 0.017    | 1.834 ± 0.110   | 4.204 ± 0.190    | 1.091 ± 0.154   | 1.943 ± 0.089    | 1.332 ± 0.097   | 3.604 ± 0.166    | 1.372 ± 0.031   | 5.074 ± 0.183    | 1.282 ± 0.213   | 4.322 ± 0.150    | 0.896 ± 0.080   | 2.991 ± 0.102    |
| iZ9G                    | 0.246 ± 0.103                 | 1.199 ± 0.248    | 0.380 ± 0.024  | 0.407 ± 0.075    | 0.201 ± 0.067  | 0.340 ± 0.037    | 0.448 ± 0.040   | 0.889 ± 0.190    | 0.167 ± 0.088   | 0.555 ± 0.113    | 0.139 ± 0.161   | 0.911 ± 0.098    | 0.316 ± 0.088   | 1.138 ± 0.153    | 0.212 ± 0.032   | 1.082 ± 0.046    | 0.090 ± 0.064   | 0.425 ± 0.134    |
| iZOG                    | 1.484 ± 0.159                 | 5.685 ± 0.311    | 1.598 ± 0.193  | 1.962 ± 0.366    | 1.437 ± 0.231  | 1.803 ± 0.111    | 2.584 ± 0.292   | 5.40 ± 0.487     | 1.439 ± 0.303   | 3.037 ± 0.382    | 2.168 ± 0.453   | 5.600 ± 0.549    | 1.715 ± 0.333   | 6.732 ± 0.422    | 2.301 ± 0.276   | 9.145 ± 1.366    | 2.029 ± 0.551   | 8.351 ± 0.125    |
| cZOG                    | 7.268 ± 0.494                 | 6.382 ± 0.917    | 9.290 ± 1.201  | 7.887 ± 0.733    | 8.233 ± 0.553  | 6.519 ± 0.355    | 8.088 ± 0.624   | 5.768 ± 0.928    | 6.220 ± 0.856   | 5.166 ± 0.231    | 5.975 ± 0.897   | 3.797 ± 0.561    | 7.989 ± 0.891   | 5.725 ± 0.276    | 7.233 ± 1.215   | 5.749 ± 0.922    | 4.818 ± 0.465   | 5.059 ± 0.963    |
| iZROG                   | 0.019 ± 0.039                 | 0.375 ± 0.077    | 0.049 ± 0.033  | 0.082 ± 0.055    | 0.038 ± 0.028  | 0.057 ± 0.045    | 0.122 ± 0.030   | 0.532 ± 0.037    | 0.047 ± 0.035   | 0.112 ± 0.033    | 0.049 ± 0.034   | 0.299 ± 0.088    | 0.044 ± 0.026   | 0.281 ± 0.088    | 0.056 ± 0.039   | 0.336 ± 0.064    | 0.062 ± 0.074   | 0.078 ± 0.098    |
| cZROG                   | 0.431 ± 0.048                 | 0.467 ± 0.056    | 0.415 ± 0.025  | 0.398 ± 0.049    | 0.462 ± 0.016  | 0.413 ± 0.030    | 0.570 ± 0.046   | 0.538 ± 0.031    | 0.349 ± 0.058   | 0.328 ± 0.021    | 0.386 ± 0.043   | 0.381 ± 0.035    | 0.373 ± 0.041   | 0.339 ± 0.035    | 0.348 ± 0.030   | 0.364 ± 0.068    | 0.365 ± 0.092   | 0.388 ± 0.033    |
| iZRPsoG                 | N.D.                          | N.D.             | N.D.           | N.D.             | N.D.           | N.D.             | N.D.            | 0.071 ± 0.008    | N.D.            | N.D.             | N.D.            | N.D.             | N.D.            | N.D.             | N.D.            | N.D.             | N.D.            | N.D.             |
| cZRPsoG                 | N.D.                          | N.D.             | N.D.           | N.D.             | N.D.           | N.D.             | N.D.            | N.D.             | N.D.            | N.D.             | N.D.            | N.D.             | N.D.            | N.D.             | N.D.            | N.D.             | N.D.            | N.D.             |
| DZ9G                    | N.D.                          | N.D.             | N.D.           | N.D.             | N.D.           | N.D.             | N.D.            | N.D.             | N.D.            | N.D.             | N.D.            | N.D.             | N.D.            | N.D.             | N.D.            | N.D.             | N.D.            | N.D.             |
| iP7G                    | 106.665 ± 5.996               | 110.080 ± 2.521  | 85.748 ± 3.400 | 82.763 ± 2.025   | 73.019 ± 4.185 | 72.792 ± 3.633   | 94.843 ± 2.322  | 93.157 ± 2.279   | 91.659 ± 3.060  | 96.398 ± 2.955   | 96.447 ± 2.128  | 98.204 ± 2.697   | 86.118 ± 3.911  | 90.078 ± 3.277   | 101.625 ± 5.550 | 113.177 ± 5.441  | 81.982 ± 5.689  | 87.289 ± 4.285   |
| iP9G                    | 2.284 ± 0.082                 | 2.398 ± 0.153    | 1.685 ± 0.089  | 1.731 ± 0.099    | 1.432 ± 0.101  | 1.421 ± 0.115    | 1.758 ± 0.060   | 1.925 ± 0.077    | 2.042 ± 0.113   | 2.126 ± 0.077    | 1.844 ± 0.067   | 1.963 ± 0.150    | 1.854 ± 0.103   | 1.828 ± 0.071    | 2.096 ± 0.049   | 2.249 ± 0.220    | 1.352 ± 0.115   | 1.499 ± 0.099    |
| iZ-type                 | 5.350 ± 0.732                 | 88.715 ± 6.592   | 6.481 ± 0.327  | 18.426 ± 1.343   | 6.003 ± 0.176  | 21.602 ± 1.377   | 8.965 ± 0.854   | 70.943 ± 4.787   | 4.521 ± 0.466   | 29.740 ± 1.165   | 7.488 ± 0.473   | 93.942 ± 3.119   | 5.488 ± 0.265   | 79.034 ± 3.270   | 6.265 ± 0.571   | 81.458 ± 3.798   | 6.641 ± 1.144   | 65.622 ± 4.057   |
| iP-type                 | 117.893 ± 6.386               | 143.075 ± 2.455  | 95.706 ± 3.014 | 98.903 ± 2.188   | 81.986 ± 4.350 | 85.660 ± 3.185   | 114.503 ± 2.591 | 133.733 ± 4.550  | 101.140 ± 3.345 | 131.833 ± 4.203  | 110.678 ± 2.402 | 148.203 ± 5.742  | 98.395 ± 3.827  | 126.651 ± 4.872  | 110.870 ± 5.987 | 152.768 ± 9.255  | 100.728 ± 6.902 | 127.371 ± 6.850  |
| iZ-type precursor       | 2.423 ± 0.347                 | 75.899 ± 6.701   | 3.010 ± 0.285  | 14.053 ± 0.934   | 2.905 ± 0.100  | 17.372 ± 1.293   | 3.838 ± 0.536   | 58.998 ± 4.304   | 1.752 ± 0.198   | 23.884 ± 1.446   | 3.773 ± 0.063   | 82.645 ± 3.498   | 2.006 ± 0.160   | 64.774 ± 3.094   | 2.329 ± 0.435   | 65.642 ± 3.313   | 3.565 ± 0.503   | 53.190 ± 4.246   |
| iP-type precursor       | 8.482 ± 0.763                 | 29.956 ± 2.072   | 7.823 ± 0.415  | 13.726 ± 1.361   | 7.084 ± 0.189  | 10.718 ± 1.033   | 17.075 ± 1.137  | 38.029 ± 2.459   | 7.054 ± 0.795   | 33.133 ± 1.060   | 11.478 ± 0.730  | 46.393 ± 2.893   | 9.510 ± 0.651   | 33.519 ± 1.637   | 14.598 ± 0.847  | 35.938 ± 3.425   | 15.627 ± 1.705  | 37.594 ± 2.401   |

4xNRE-ming-GUS. The parental line of NLP6-SUPRD lines. N.D., not detected.

iZ, *trans*-zeatin; iZR, iZ riboside; iZRPs, iZ ribotides; cZ, *cis*-zeatin; cZR, cZ riboside; cZRPs, cZ ribotides; DZ, dihydrozeatin; DZR, DZ riboside; DZRPs, DZ ribotides; iP, N<sup>6</sup>-( $\Delta^2$ -isopentenyl)adenine; iPR, iP riboside; iPRPs, iP ribotides; iZ7G, iZ-7-N-glucoside; iZ9G, iZ-9-N-glucoside; iZOG, iZ-O-glucoside; cZOG, cZ-O-glucoside; iZROG, iZR-O-glucoside; cZROG, cZR-O-glucoside; DZ9G, DZ-9-N-glucoside; iP7G, iP-7-N-glucoside; iP9G, iP-9-N-glucoside.

Supplementary Table 2. Primer list

| Amplicon                                                                           | AGI code  | Sequence                                                                                                                                                  |
|------------------------------------------------------------------------------------|-----------|-----------------------------------------------------------------------------------------------------------------------------------------------------------|
| <b>Cloning for transient assay</b>                                                 |           |                                                                                                                                                           |
| <i>NRT2.1</i> promoter                                                             | At1g08090 | CGCAAGCTTCACGTCACGAGATTGATCGA<br>CGTCCATGGTTATAAAATATTTCAAGTTTCT                                                                                          |
| <i>NRT2.1</i> promoter (NIGT1-site_mut1)                                           | At1g08090 | GCAAGATGAGGGGAGGGTAGAGCG<br>TTTTTCGAGTACTCCATTTTCGCCGCAAGCATCT<br>GAAAATGGAGTACTCGAAAATTAATTTAAA<br>CGTCCATGGTTATAAAATATTTCAAGTTTCT                       |
| <i>NRT2.1</i> promoter (NIGT1-site_mut2)                                           | At1g08090 | GCAAGATGAGGGGAGGGTAGAGCG<br>TCTTTGGAGAGTATCAACGGTTAACTATCGATT<br>CCGTTGATACTCCAAAGAATGCTTTTTTCA<br>CGTCCATGGTTATAAAATATTTCAAGTTTCT                        |
| <i>NRT2.1</i> promoter (NIGT1-site_mut3)                                           | At1g08090 | GCAAGATGAGGGGAGGGTAGAGCG<br>TGAGATTGAGTAAAGTTTATTTGATCGATGA<br>TAACTTTACTCAAATCTCAAAGTCAAAA<br>CGTCCATGGTTATAAAATATTTCAAGTTTCT                            |
| <i>NRT2.1</i> promoter (NLP-site_D1mut)                                            | At1g08090 | CGCAAGCTTCACGTCACGAGATTGATCGA<br>ATTAGTTTTATCGTCAAATGCTTACGATGTCAT<br>AATTTGACGATAAACTAATGTGCAGTAAAGCC<br>CGTCCATGGTTATAAAATATTTCAAGTTTCT                 |
| <i>NRT2.1</i> promoter (NLP-site_P1mut)                                            | At1g08090 | CGCAAGCTTCACGTCACGAGATTGATCGA<br>ATCACACATGGTCCGATATCCTTCCAAATGAC<br>TATCGGCACCATGTGGTATAAGCGAGAGACTAGG<br>CGTCCATGGTTATAAAATATTTCAAGTTTCT                |
| <i>NRT2.1</i> promoter (NLP-site_P2mut)                                            | At1g08090 | CGCAAGCTTCACGTCACGAGATTGATCGA<br>TTCTAGTATCGCGCTTATCACCAGGTTTGC<br>GATAAGCGGATCTAGGAAGATGCTTCCGG<br>CGTCCATGGTTATAAAATATTTCAAGTTTCT                       |
| <i>NRT2.1</i> promoter (NLP-site_P1P2mut)                                          | At1g08090 | CGCAAGCTTCACGTCACGAGATTGATCGA<br>ATCGCGCTTATCACACATGGTCCGATATCCTTCCAAATGAC<br>CCATGTGGTATAAGCGGATAGGAAAGATGCTTCCGG<br>CGTCCATGGTTATAAAATATTTCAAGTTTCT     |
| <i>NIGT1.1</i> promoter                                                            | At1g25550 | CTCGGATCCGAATACATACTCAAATAGACACTT<br>GTGCCATGGTGAACAGATCTAGACTCGTTTTTG                                                                                    |
| <i>NIGT1.2/HHO2</i> promoter                                                       | At1g68670 | CTCGGATCCGAGGAATATGAAAGGTCGGATATG<br>GTGCCATGGTTATTTCAAAGGGCACTAAGAACA                                                                                    |
| <i>NIGT1.3/HHO1</i> promoter                                                       | At3g25790 | CTCGGATCCGGATATAACAACAGCATAGCATAT<br>GTGCCATGGTGGTTAAGGGACAAAACAAAACC                                                                                     |
| <i>NIGT1.4/HRS1</i> promoter                                                       | At1g13300 | CTCGGATCCAATGAAGGTGTTATTAGTAGTGCC<br>GTGCCATGGTGAATCTTATAGGACTTAATTTAA                                                                                    |
| <i>NIGT1.1</i> promoter mut_P1BSn<br>-655 to -648 from ATG<br>GAATATTC to TACTAGTA | At1g25550 | CTCGGATCCGAATACATACTCAAATAGACACTT<br>GTGGAGTACTAGTACTCGAGAGTGGGAGAACTAAG<br>CTCGAGTACTAGTACTCCACTTTTGCCAAAACCTCTT<br>GTGCCATGGTGAACAGATCTAGACTCGTTTTTG    |
| <i>NIGT1.1</i> promoter mut_P1BS3<br>-502 to -495 from ATG<br>GGATATTC to TGCTAGTA | At1g25550 | CTCGGATCCGAATACATACTCAAATAGACACTT<br>GAAGAATACTAGCAATAGAGATTGGAATCAAGATATG<br>TCTCTATTGCTAGTATTCTTCACTCGTTTGTATTACAA<br>GTGCCATGGTGAACAGATCTAGACTCGTTTTTG |
| <i>NIGT1.1</i> promoter mut_P1BSc<br>-299 to -292 from ATG<br>GAATATTC to TACTAGTA | At1g25550 | CTCGGATCCGAATACATACTCAAATAGACACTT<br>CAGGGATACTAGTAGGGATATGGATTCCCTTCTTT<br>ATCCCTACTAGTATCCCTGTATCAAACAAACCTCAGC<br>GTGCCATGGTGAACAGATCTTAGACTCGTTTTTG   |
| <i>NIGT1.1</i> promoter mut_NBS2<br>-315 to -311 from ATG<br>GAATC to TACTC        | At1g25550 | CTCGGATCCGAATACATACTCAAATAGACACTT<br>GATATGTGGAGTACTCTTTCCATATCTATCGAGC<br>AAGGAAGTACTCCACATATCCCGAATATCTCCCT<br>GTGCCATGGTGAACAGATCTTAGACTCGTTTTTG       |
| <i>NIGT1.1</i> promoter mut_NBS1<br>-202 to -198 from ATG<br>GATTC to GAGTA        | At1g25550 | CTCGGATCCGAATACATACTCAAATAGACACTT<br>CTAAAACCTACTCTTTGATGTTTAAATTTATCCGG<br>TCAAGAAGAGTAGGTTTTAGGTACGCGACGGCCGA<br>GTGCCATGGTGAACAGATCTTAGACTCGTTTTTG     |
| <i>NIGT1.1</i> promoter mut_NBS2 on mut P1BSc                                      | At1g25550 | CTCGGATCCGAATACATACTCAAATAGACACTT<br>GATATGTGGAGTACTCTTTCCATATCTATCGAGC<br>AAGGAAGTACTCCACATATCCCTACTAGTATCCCT<br>GTGCCATGGTGAACAGATCTTAGACTCGTTTTTG      |
| <i>NIGT1.1</i> CDS                                                                 | At1g25550 | TATGGATCCATGGGTATGATGATGTTCAAGAGCGG<br>TCTAGGCCTTGAAGAGGAGAAAGGTGTGG                                                                                      |
| <i>NIGT1.2/HHO2</i> CDS                                                            | At1g68670 | TATGGATCCATGGGTATGATGATGATGATGATTAC<br>TCTAGGCCTTGACACAGGATAGAAGTATTTGT                                                                                   |
| <i>NIGT1.3/HHO1</i> CDS                                                            | At3g25790 | TATGGATCCATGGGTATGATGATGATGATGATGATG<br>TCTAGGCCTTATTTCTGACGTAATGATTACGG                                                                                  |
| <i>NIGT1.4/HRS1</i> CDS                                                            | At1g13300 | TATGGATCCATGGGTATGATGATGATGATGATGATG<br>TCTAGGCCTTGATATTTTGTCTTTCTG                                                                                       |
| LBD37 CDS                                                                          | At5g67420 | ATATCCATGGATGAGCTGCAATGGTTGC<br>GGGCAGGCCAACAAGGTTAAGCAAC                                                                                                 |
| PHR1 CDS                                                                           | At4g28610 | GTGCCATGGAGGCTCGTCCAGTTCATAGA<br>GTCAGGCCTATTATCGATTTTGGGACGCTTTGGCTG                                                                                     |
| <b>RT-qPCR</b>                                                                     |           |                                                                                                                                                           |
| <i>NIGT1.1</i>                                                                     | At1g25550 | TCGATGGTTAACTAATGACGAAGT<br>TTACTACCGGAGTAGCTGGTCTTC                                                                                                      |
| <i>NIGT1.1</i> (endogenous only)                                                   | At1g25550 | ACACACACACCACACCTCT<br>ACGAACATCTTGGTTACAAAACA                                                                                                            |
| <i>NIGT1.2/HHO2</i>                                                                | At1g68670 | TAGACTTCACACAAGAAGGCCAG<br>AATTGGGTTGTTGCTGATTCC                                                                                                          |
| <i>NIGT1.3/HHO1</i>                                                                | At3g25790 | GCCAGAAGAGGGCAGAGAAA<br>ATGAGGGCCACCAAGTTGTT                                                                                                              |

Supplementary Table 2. Primer list (continued)

| Amplicon                                  | AGI code  | Sequence                                                                               |
|-------------------------------------------|-----------|----------------------------------------------------------------------------------------|
| <b>RT-qPCR</b>                            |           |                                                                                        |
| <i>NIGT1.4/HRS1</i>                       | At1g13330 | CTAACACGGAAACTCTCAACG<br>CGGTAGTCTTGCCCGTAGAGTA                                        |
| <b>RT-qPCR</b>                            |           |                                                                                        |
| <i>NRT2.1</i>                             | At1g08090 | TGAGCAGGAGAAGCAGAAGA<br>TTGTTGGGTGTGTTCTCAGG                                           |
| <i>NAR2.1/NRT3.1</i>                      | At5g50200 | CTACGGGTTGATGCCATTG<br>GTCGGTGCTGTGCATAGG                                              |
| <i>CYP735A2</i>                           | At1g67110 | TGGACTCTCATGCTCCTTGC<br>ACAACCTTGCCGGACCTCAT                                           |
| <i>HYH</i>                                | At3g17609 | CAGAGTATCAGCGCAACAAGC<br>TCTCTTCGAGCTGGTCATTGT                                         |
| <i>UBQ10<sup>a</sup></i>                  | At4g05320 | GGCCTTGATAATCCCTGATGAATAAG<br>AAAGAGATAACAGGAACGGAAACATAGT                             |
| <i>IPS1</i>                               | At3g09922 | AGACTGCAGAAAGCTGATTCAGA<br>TTGCCCAATTCTAGAGGGAGA                                       |
| <i>PEX4<sup>b</sup></i>                   | At5g25760 | CTGCCACTCAGGGAATCTTAA<br>TTTGCCATTGAATTGAACCC                                          |
| <b>RT-PCR</b>                             |           |                                                                                        |
| <i>NIGT1.1</i>                            | At1g25550 | TGGAACCAATCACCAGATCC<br>AGTAGAAGATGTTGCCGGAGAT                                         |
| <i>NIGT1.2/HHO2</i>                       | At1g68670 | TGATGGTGAGATGGATTACG<br>ACCACCCCTTGTGGCTACATCGGA                                       |
| <i>NIGT1.3/HHO1</i>                       | At3g25790 | CGAGCTTCTCTTTGCGTAG<br>CTTTTCTTTGAGCGATCCTG                                            |
| <i>NIGT1.4/HRS1</i>                       | At1g13330 | GTCGCAATTGCATGACGCTTC<br>GTAGAAGAGACATGCCGG                                            |
| <i>EF1a</i>                               | At5g60390 | ATGCCCCAGGACATCGATTTCAT<br>TTGGCGCACCCCTAGCTGGATCA                                     |
| <b>EMSA probes</b>                        |           |                                                                                        |
| <i>NRT2.1</i> promoter fragment p1_1st    | At1g08090 | CACGTCAGCGAGATTGATCG<br>AGGAAACAGCTATGACCATGCAAAAGAAAAACGGCAAACTAAATA                  |
| <i>NRT2.1</i> promoter fragment p1_2nd    | At1g08090 | CACGTCAGCGAGATTGATCG<br>Biotin-ACACAGGAAACAGCTATGACCATG (BIO-M13)                      |
| <i>NRT2.1</i> promoter fragment p2_1st    | At1g08090 | CTGTTTTATTTAGTTTGGCGTTTTTC<br>AGGAAACAGCTATGACCATGTAGTTGCTCTTCAAATTGCTTAC              |
| <i>NRT2.1</i> promoter fragment p2_2nd    | At1g08090 | CTGTTTTATTTAGTTTGGCGTTTTTC<br>Biotin-ACACAGGAAACAGCTATGACCATG (BIO-M13)                |
| <i>NRT2.1</i> promoter fragment p3_1st    | At1g08090 | GCAATCGTAAGCAATTTGAAGAGA<br>AGGAAACAGCTATGACCATGACACTTAATTTGAACGTGTAAC                 |
| <i>NRT2.1</i> promoter fragment p3_2nd    | At1g08090 | GCAATCGTAAGCAATTTGAAGAGA<br>Biotin-ACACAGGAAACAGCTATGACCATG (BIO-M13)                  |
| <i>NRT2.1</i> promoter fragment p4_1st    | At1g08090 | CATGCTGTTACAGCAGTTCAAAT<br>AGGAAACAGCTATGACCATGAATGACCGCTCTACCCCTCCCTCA                |
| <i>NRT2.1</i> promoter fragment p4_2nd    | At1g08090 | CATGCTGTTACAGCAGTTCAAAT<br>Biotin-ACACAGGAAACAGCTATGACCATG (BIO-M13)                   |
| <i>NRT2.1</i> promoter fragment p5_1st    | At1g08090 | GCAAGATGAGGGGAGGGTAGAGCG<br>AGGAAACAGCTATGACCATGTGTTATAAAAATTTCAAGTTTCT                |
| <i>NRT2.1</i> promoter fragment p5_2nd    | At1g08090 | GCAAGATGAGGGGAGGGTAGAGCG<br>Biotin-ACACAGGAAACAGCTATGACCATG (BIO-M13)                  |
| <i>NRT2.1</i> promoter fragment p5-1_1st  | At1g08090 | CACGTCAGCGAGATTGATCG<br>AGGAAACAGCTATGACCATGCAACGGTTAACTATCGATTAAATAT                  |
| <i>NRT2.1</i> promoter fragment p5-1_2nd  | At1g08090 | CACGTCAGCGAGATTGATCG<br>Biotin-ACACAGGAAACAGCTATGACCATG (BIO-M13)                      |
| <i>NRT2.1</i> promoter fragment p5-2_1st  | At1g08090 | AATATTTAAATCGATAGTTAACCGTTG<br>AGGAAACAGCTATGACCATGCGATGCTGAATTAATCACACG               |
| <i>NRT2.1</i> promoter fragment p5-2_2nd  | At1g08090 | AATATTTAAATCGATAGTTAACCGTTG<br>Biotin-ACACAGGAAACAGCTATGACCATG (BIO-M13)               |
| <i>NRT2.1</i> promoter fragment p5-3_1st  | At1g08090 | ATTGTCAACACTGGCTAGGAACCC<br>AGGAAACAGCTATGACCATGTGTTATAAAAATTTCAAGTTTCT                |
| <i>NRT2.1</i> promoter fragment p5-3_2nd  | At1g08090 | ATTGTCAACACTGGCTAGGAACCC<br>Biotin-ACACAGGAAACAGCTATGACCATG (BIO-M13)                  |
| <i>OsNIGT1_1st</i>                        |           | CGACGACACCTTCATTTTTATTTTC<br>AGGAAACAGCTATGACCATGTTGCTGGGGTGAGGAAGGAAGAA               |
| <i>OsNIGT1_2nd</i>                        |           | CGACGACACCTTCATTTTTATTTTC<br>Biotin-ACACAGGAAACAGCTATGACCATG (BIO-M13)                 |
| <i>NRT2.1</i> Proximal_1st                | At1g08090 | GTCTAGACTGCAGCTGTGCGAGGATATCGCAACCTTTGG<br>GCAAGCTTGTGAGCATGCGGATCTTCTAGTCTCTCGCTTA    |
| <i>NRT2.1</i> Proximal_2nd                |           | Biotin-GTCTAGACTGCAGCTGTGCGA (BIO-OligoZ)<br>Biotin-GCAAGCTTGTGAGCATGCGGA (BIO-oligoY) |
| <i>NRT2.1</i> Distal1_1st                 | At1g08090 | GTCTAGACTGCAGCTGTGCGATCCTATATGCAATCGTAAG<br>GCAAGCTTGTGAGCATGCGGACATTAGTTGCTCTCAAATTG  |
| <i>NRT2.1</i> Distal1_2nd                 |           | Biotin-GTCTAGACTGCAGCTGTGCGA (BIO-OligoZ)<br>Biotin-GCAAGCTTGTGAGCATGCGGA (BIO-oligoY) |
| <i>NRT2.1</i> Distal2_1st                 | At1g08090 | GTCTAGACTGCAGCTGTGCGATTTGAAGAGACAATAATGTG<br>GCAAGCTTGTGAGCATGCGGATTTAGAGTGGCCCTAGCTGC |
| <i>NRT2.1</i> Distal2_2nd                 |           | Biotin-GTCTAGACTGCAGCTGTGCGA (BIO-OligoZ)<br>Biotin-GCAAGCTTGTGAGCATGCGGA (BIO-oligoY) |
| <b>Cloning for recombinant expression</b> |           |                                                                                        |
| <i>NIGT1.1</i> DBD                        | At1g25550 | CGTCCATGGCTGGGGTGGAAAAGATTTGAGGAG<br>CGTCTCGAGACCACCGGTCTTACTACCGGAGT                  |
| <b>Binary plasmid construction</b>        |           |                                                                                        |
| <i>NIGT1.1</i> CDS                        | At1g25550 | CGTCCATGGCTATGTTCAAGAGCGGTGACATGGAT<br>TCTAGGCCTTGAAGAGGAAGAGGTGTGG                    |



Supplementary Table 2. Primer list (continued)

| Amplicon                                      | AGI code  | Sequence                                                                              |
|-----------------------------------------------|-----------|---------------------------------------------------------------------------------------|
| <b>ChIP-qPCR</b>                              |           |                                                                                       |
| <i>NRT2.1</i> pro_1                           | At1g08090 | TGACACGTCAGCGAGATTGA<br>CGGTGTGAAAAATTGAAATCGTTGA                                     |
| <i>NRT2.1</i> pro_2                           | At1g08090 | GATGAAGACATGTACACACACGA<br>ACATACAGTGATACAGGATAGGCT                                   |
| <i>NRT2.1</i> pro_3                           | At1g08090 | TGGTGAAGAGGACCAAACTTT<br>GCTCACCAGTAGAATCACCCA                                        |
| <i>NRT2.1</i> pro_4                           | At1g08090 | GGGTAGAGCGGTCATTGGGA<br>GCTCACCAGTAGAATCACCCA                                         |
| <i>NAR2.1</i> pro_1                           | At5g50200 | CAGTGAACGGTTACCTGAGGA<br>AGGGTTGATGTTTGTAGGCTGT                                       |
| <i>NAR2.1</i> pro_2                           | At5g50200 | TGAAAGCAAGACCTAAACCCA<br>GCCAAAGGATGAGATATGAGTATTTGT                                  |
| <i>NIGT1.1</i> pro_1                          | At1g25550 | TGCTGATCCGATCGTTGT<br>CCATGGATGTGAAGACCACCA                                           |
| <i>NIGT1.1</i> pro_2                          | At1g25550 | ACATCATCGCCAGCTCGATA<br>GGCAGAGAAAAGGAGTTGTT                                          |
| <i>NIGT1.2/HHO2</i> pro_3                     | At1g68670 | GGAATCGAACCACCAAAGAA<br>GCTAAATGTTACGCGCATA                                           |
| <i>NIGT1.2/HHO2</i> pro_4                     | At1g68670 | ACGTCAGTTCCAGCCATAC<br>GAAGTGAAGAGAAATCGAGGTC                                         |
| <i>NIGT1.3/HHO1</i> pro_5                     | At3g25790 | CTCGAGACTCGAATAGGTGGA<br>TATGTTCCGGTGATGTCCAA                                         |
| <i>NIGT1.3/HHO1</i> pro_6                     | At3g25790 | CCCAAATAAATAAAGTTCACACGA<br>GGCTCTATAGGGTTTCTCAAGG                                    |
| <i>NIGT1.4/HRS1</i> pro_7                     | At1g13300 | GGCGACAGGAAAGAACT<br>TCCTCATGCATTCCTCAAC                                              |
| <i>NIGT1.4/HRS1</i> pro_8                     | At1g13300 | GGTCTCTAATAAGTATCCA<br>AGGATCAGTATTTTGAAGTGA                                          |
| <i>IPS1</i> pro_9                             | At3g09922 | CCTGACAGCTCAAGGCATTA<br>TGATGGAACAAGGGGAGTC                                           |
| <i>IPS1</i> pro_10                            | At3g09922 | GTGGTTGCATGCTTGTTTA<br>TTAGGGTAAAAAGGGGCATC                                           |
| <i>CYP735A2_c1</i>                            | At1g67110 | GAATGTGGTAATAGCGAATATGAGACA<br>CTTATCTACTTGGGTGATTGAAATC                              |
| <i>CYP735A2_c2</i>                            | At1g67110 | CTAGATAGCAACCACTTCCACAA<br>CAAGATTTGAGAAAGAGAAAAGAGAT                                 |
| <i>HYH_h1</i>                                 | At3g17609 | TGTTTATGAGTATTTCCCGC<br>AGTCAATCATCCGAAGCATTT                                         |
| <i>HYH_h2</i>                                 | At3g17609 | CATGCAAAATAGATACACACACATA<br>CTCAAAGTCTGCAACTCGTTCA                                   |
| <b>Genotyping of T-DNA lines</b>              |           |                                                                                       |
| T-DNA allele of GABI_267G03                   | At1g25550 | CCCATTGGAGCGAATGTAGACAC (GABI LBP)<br>AGTAGAAGATGTTCCGGGAGAT                          |
| WT allele for GABI_267G03                     | At1g25550 | TGGAACCAATCACCAGATCC<br>AGTAGAAGATGTTCCGGGAGAT                                        |
| T-DNA allele of SALK_044835C                  | At1g68670 | AGCAATCGCAGTCGCATACGCAT<br>ATTTTGCCGATTTCGGAAC-(Lb1.3)                                |
| WT allele for SALK_044835C                    | At1g68670 | AGCAATCGCAGTCGCATACGCAT<br>ACCACCCTTGTGGCTACATCGGA                                    |
| T-DNA allele of SALK_070096                   | At1g68670 | TGATGGTGGAGATGGATTACG<br>ATTTTGCCGATTTCGGAAC-(Lb1.3)                                  |
| WT allele for SALK_070096                     | At1g68670 | TGATGGTGGAGATGGATTACG<br>GTTTTCTATGCGTATGCGGACTG                                      |
| T-DNA allele of SAIL_28_D03                   | At3g25790 | GAAATGGATAAATAGCCTTGCTTC (pCSA110_LB3)<br>CTTTTCTTGTGAGCGATCCTG                       |
| WT allele for SAIL_28_D03                     | At3g25790 | CSAGCTTCTCTTTGCGTAG<br>CTTTTCTTGTGAGCGATCCTG                                          |
| T-DNA allele of WiscDsLxHS231_10C             | At3g25790 | TGATCCATGTAGATTTCCGGACATGAAG (L4)<br>CTTTTCTTGTGAGCGATCCTG                            |
| WT allele for WiscDsLxHS231_10C               | At3g25790 | CGAGCTTCTCTTTGCGTAG<br>CTTTTCTTGTGAGCGATCCTG                                          |
| T-DNA allele of SALK_067074                   | At1g13300 | ATTTTGCCGATTTCGGAAC (pROK2_LB1.3)<br>TCTTTTTTTCTTCCACTTGCCTAC                         |
| WT allele for SALK_067074                     | At1g13300 | GTCGCAATTGCATAGACGCTTC<br>TCTTTTTTTCTTCCACTTGCCTAC                                    |
| T-DNA allele ( <i>nlp6</i> ) of SALK_036557   | At1g64530 | GTGCTGCAGTTATCAATTATCGATTTGGGACGCTT<br>CTCGGTACCAGGGCAGTTCTTTGTAATTGGAT               |
| WT allele ( <i>NLP6</i> ) for SALK_036557     | At1g64530 | GTGAGCCCTAGTTACTGTGCCATCAAAGCCAAG<br>TCCTTAGAGATTTGTGCTGGATGA                         |
| T-DNA allele ( <i>nlp7-1</i> ) of SALK_026134 | At4g24020 | GTGCTGCAGTTATCAATTATCGATTTGGGACGCTT<br>GTCAGGCCCTCAATCTCCAGTGTCTCGCAGGA               |
| WT allele ( <i>NLP7</i> ) for SALK_026134     | At4g24020 | GTTGAATTCGCCACTGTTAACGGTGTGGTTAAG<br>GTCAGGCCCTCAATCTCCAGTGTCTCGCAGGA                 |
| T-DNA allele ( <i>phr1</i> ) of SALK_067629C  | At4g28610 | CGCTGGACCGCTTGTGCAACT (pROK2_LB1)<br>GTGCTGCAGTTATCAATTATCGATTTGGGACGCTT              |
| WT allele ( <i>PHR1</i> ) for SALK_067629C    | At4g28610 | GTGCCATGGAGCTCGTCCAGTTCATAGA<br>GTGCTGCAGTTATCAATTATCGATTTGGGACGCTT                   |
| T-DNA allele ( <i>phl1</i> ) of SAIL_731_B09  | At5g29000 | GTCGGATCCATGACTCTGGCTAATGATTTCCGGA<br>TAGCATCTGAATTTCAATAACCACTCGATACAC (pCSA110-LB3) |
| WT allele ( <i>PHL1</i> ) for SAIL_731_B09    | At5g29000 | GTCGGATCCATGACTCTGGCTAATGATTTCCGGA<br>GTCAGGCCATCTCTCTGACACGTTTCTTGA                  |

<sup>a</sup>Czechowski T, Stitt M, Altmann T, Udvardi MK, Scheible WR. Genome-wide identification and testing of superior reference genes for transcript normalization in Arabidopsis. *Plant Physiol.* 139, 5-17 (2005)

## Supplementary References

1. Konishi, M. & Yanagisawa, S. Emergence of a new step towards understanding the molecular mechanisms underlying nitrate-regulated gene expression. *J. Exp. Bot.* **65**, 5589–5600 (2014).
2. Winter, D. *et al.* An “Electronic Fluorescent Pictograph” browser for exploring and analyzing large-scale biological data sets. *PLoS One* **2**, (2007).
3. Liu, K. H. *et al.* Discovery of nitrate-CPK-NLP signalling in central nutrient-growth networks. *Nature* **545**, 311–316 (2017).
