# Supplementary material for: A NIGT1-centred transcriptional cascade regulates nitrate signalling and incorporates phosphorus starvation signals in Arabidopsis
Source: PubMed Central journal article supplement (PMC5893545; doi:10.1038/s41467-018-03832-6), 2018-04-10
Supplement: 41467_2018_3832_MOESM2_ESM.pdf [file 41467_2018_3832_MOESM2_ESM.pdf]

## **Description of Additional Supplementary Files**

Supplementary Data 1.

List of nitrate-inducible genes whose expression is repressed by NIGT1.2 overexpression.

Supplementary Data 2.

List of nitrate-repressed genes whose expression is reduced by NIGT1.2 overexpression.
